# Supplementary material for: Trajectory inference across multiple conditions with condiments
Source: PubMed Central journal article supplement (PMC10821945; doi:10.1038/s41467-024-44823-0), 2024-01-27
Supplement: 41467_2024_44823_MOESM1_ESM.pdf [file 41467_2024_44823_MOESM1_ESM.pdf]

## 951 S-1 Supplementary methods

### 952 S-1.1 Other methods implemented in the **condiments** package to test equality 953 of distributions.

954 These methods were found to be less efficient in initial benchmarking, but are implemented in case users  
955 wish to apply them.

#### 956 S-1.1.1 Multivariate case: The two-sample kernel test

957 **Mean maximum discrepancy.** The two-sample kernel test was defined by Gretton et al. [37] and  
958 relies on the mean maximum discrepancy (MMD). Considering a kernel function

$$k : \mathbb{R}^d \times \mathbb{R}^d \rightarrow \mathbb{R} \\ (x, y) \mapsto k(x, y)$$

the MMD is then defined as

$$MMD^2(\mathbf{P}_1, \mathbf{P}_2, k) \equiv \mathbb{E}_{\mathbf{P}_1, \mathbf{P}_1}[k(X, X')] + \mathbb{E}_{\mathbf{P}_2, \mathbf{P}_2}[k(Y, Y')] - 2\mathbb{E}_{\mathbf{P}_1, \mathbf{P}_2}[k(X, Y)].$$

959 For a properly defined kernel, we have  $MMD^2(\mathbf{P}_1, \mathbf{P}_2, k) = 0$  i.i.f.  $\mathbf{P}_1 = \mathbf{P}_2$ .

960 **Unbiased statistic.** Following Gretton et al. [37], we define the unbiased MMD statistic:

$$MMD_u^2(\mathbf{X}, \mathbf{Y}) \equiv \frac{1}{n(n-1)} \sum_{i=1}^n \sum_{j \neq i}^n k(\mathbf{X}_i, \mathbf{X}_j) + \frac{1}{m(m-1)} \sum_{i=1}^m \sum_{j \neq i}^m k(\mathbf{Y}_i, \mathbf{Y}_j) - \frac{2}{mn} \sum_{i=1}^n \sum_{j=1}^m k(\mathbf{X}_i, \mathbf{Y}_j).$$

961 **Linear statistic for faster computations.** While the  $MMD^2$  offers fast convergence, it can be  
962 burdensome to compute when  $m$  and  $n$  get large. Gretton et al. [37] propose a linear statistic in the case  
963  $m = n$ . We can extend this in the general setting by just sampling a fixed fraction of the terms of each  
964 sum. This lowers kernel computation costs drastically.

965 **Null distribution of the statistic.** For some kernels, the  $MMD_u^2$  follows some theoretical inequalities  
966 under the null that allows one to define rejection regions. However, this is not always the case. Therefore,  
967 in practice, we instead rely on permutations to compute a null distribution for the test statistic. Under  
968 the null,  $\mathbf{X}_i$  and  $\mathbf{Y}_j$  are from the same distribution so they can be swapped in the sums. We can therefore  
969 generate an empirical distribution and use it to define rejection regions.

#### 970 S-1.1.2 Multivariate case: Optimal transport

971 We consider the Wasserstein distance [44, 45], also known as earth’s mover distance, between the two  
972 distributions, estimated using the samples  $\mathbf{X}$  and  $\mathbf{Y}$ . We can generate a null distribution for this metric  
973 by permuting observations in the combined  $\mathbf{X}$  and  $\mathbf{Y}$  datasets, thereby obtaining a valid test for  $H_0 :$   
974  $\mathbf{P}_1 = \mathbf{P}_2$ . This works in any number of dimensions, but is limited to the two-sample case.

#### 975 S-1.1.3 No confounding

976 Some settings allow for proper experimental design, such that there is no confounding and each batch  
977 contains cells from each condition. In such cases, we propose two additional methods.

978 `distinct` [46] is a statistical testing method that uses permutation to compare distributions and relies  
979 on the existence of multiple batches.

980 We also implemented a version of the `topologyTest` that is run on each batch separately, using any of  
981 the previously mentioned statistical testing methods. The  $p$ -values can then either be combined via Stouf-  
982 fer’s Z-score method [41], or each batch can be analyzed separately to identify potential normalization  
983 problems or interesting biological results.

## 984 S-1.2 Multinomial test

We consider a set of categories arbitrarily numbered from 1 to  $C$ . Additionally, we consider a null distribution  $\mathbf{C}_0$ , defined on 1 to  $C$  by a vector of probabilities  $\mathbf{p} = \{p_c\}_{c=1}^C$ . Then, given a set of  $n$  i.i.d. realizations  $(c_1, \dots, c_n)$  of a random variable  $\mathbf{C}$ , we can test the null hypothesis  $H_0 : \mathbf{C} \sim \mathbf{C}_0$  or, equivalently,  $H_0 : \mathbf{P}(\mathbf{C} = c) = p_c, \forall c \in \{1, \dots, C\}$  as follows. Under the null,  $\mathbf{P}_{H_0}(c_i) = p_{c_i}$  and the associated  $p$ -value of the multinomial test can be defined as:

$$P(x, \mathbf{p}) = \sum_{y \in \{1, \dots, C\}^n : \mathbf{P}_{H_0}(y) \leq \mathbf{P}_{H_0}(x)} \mathbf{P}_{H_0}(y).$$

985 It verifies:  $\forall \alpha \in [0 : 1], \mathbf{P}_{H_0}(P(x, \mathbf{p}) \leq \alpha) \leq \alpha$ .

## 986 S-1.3 Case studies: Pre-processing.

987 **TGF- $\beta$ .** The two conditions are normalized separately using SCTransform [47] and then integrated  
988 using Seurat [20]. The reduced-dimensional representation is computed using UMAP [28] on the top 50  
989 principal components (PC). The imbalance score is computed with parameters  $k = 20$  and  $smooth = 40$ .  
990 The trajectory is estimated using slingshot. The topologyTest is run with 100 permutations with the  
991 Kolmogorov-Smirnov test and default threshold of .01. The progressionTest is run with defaults. All  
992 genes with at least 2 reads in 15 cells are kept. The smoothers are fitted for each gene using 7 knots,  
993 as recommended by the evaluateK function. Gene set enrichment analysis is done using the fgsea [32]  
994 package on the GO Biological Process ontology sets.

995 **Fibrosis.** The reduced-dimensional coordinates were obtained from the original publication. The im-  
996 balance score is computed with parameters  $k = 20$  and  $smooth = 30$  and the topologyTest is run  
997 with the default parameters. The trajectories are estimated using slingshot. The progressionTest and  
998 fateSelectionTest are run with defaults. All genes with at least 2 reads in 30 cells are kept. The  
999 smoothers are fitted for each gene using 6 knots, as recommended by the evaluateK function.

1000 **TCCD.** We follow the workflow of the original publication. The dataset is first filtered using the cell  
1001 type assignments from the original publication to only retains cells labelled as hepatocytes. The count  
1002 matrix is scaled using Seurat [20] and reduced-dimensional coordinates are computed using UMAP [28]  
1003 on the top 30 PCs. The imbalance score is computed with default  $k$  and  $smooth = 5$ . The trajectory is  
1004 estimated using slingshot. The topologyTest is run with 100 permutations with the Kolmogorov-Smirnov  
1005 test and default threshold of .01. The progressionTest is run with defaults. All genes with at least 3  
1006 reads in 10 cells are kept. The smoothers are fitted for each gene using 7 knots, as recommended by the  
1007 evaluateK function.

1008 **KRAS.** The reduced-dimensional coordinates were obtained from the original publication, using Zinb-  
1009 wave [48]. The imbalance score is run with defaults and the topologyTest is run with 100 permutations  
1010 with the classifier test and default threshold of .01. The trajectories are estimated using slingshot with pa-  
1011 rameters  $reweight = FALSE$  and  $reassign = FALSE$ . The progressionTest and fateSelectionTest  
1012 are run with defaults. All genes with at least 5 reads in 10 cells are kept. The smoothers are fitted for  
1013 each gene using 6 knots, as recommended by the evaluateK function.

## 1014 S-1.4 Runtimes

1015 We use the **TGF- $\beta$**  dataset to compute runtimes as a function of the number of cells. The number of  
1016 genes is only a factor in Step 3, and can be naively parallelized.

1017 We randomly sample cells, by spatial Id and condition, with  $n \in \{100, 200, 500, 1000, 2000, 5000, 9268\}$ ,  
1018 10 times, and we compute the runtimes of each step, varying the number of knots in Step 3.

## 1019 S-1.5 Statistical validity and properties of the p-values of Step 3

1020 **Statistical validity of the  $p$ -values** : To assess the statistical validity of the  $p$ -values produced by  
1021 the **conditionTest**, we generate  $p$ -values under the null. To do so, we use the **TGFB** dataset, but we  
1022 randomly assign each cell to a condition  $A$  or  $B$  that we use as input to the **fitGam** function. We then  
1023 run the **conditionTest**, testing against varying levels of log-fold-change cut-offs. Results are presented  
1024 in the corresponding supplementary results section.

1025 **Controlling the false discovery rate** : To assess how the false discovery rate is controlled via  
1026 Benjamini-Hochberg correction [24], we generate a new simulated dataset. We first use **fitGAM** on all  
1027 genes of the **TGF- $\beta$**  dataset, using only the 5,027 cells from the control condition, and extract the fitted  
1028 negative binomial distribution. We then sample from that distribution, using the pseudotimes of the  
1029 original cells as inputs. For half of the cells, and for genes among the top 1,000 most associated with  
1030 pseudotime via the **associationTest**, we amplify the association by multiplying the coefficients  $s_{jlc}$  (see  
1031 Equation 11) by a factor of 2, meaning that we create a log-fold-change effect of 2 for those genes.

1032 We then reran **fitGAM** on this simulated dataset, followed by the **conditionTest** testing against  
1033 varying log-fold-change cut-offs. This entire procedure was repeated 10 times. Results are presented in  
1034 the corresponding supplementary results section.

## 1035 S-2 Supplementary Results

### 1036 S-2.1 Examples

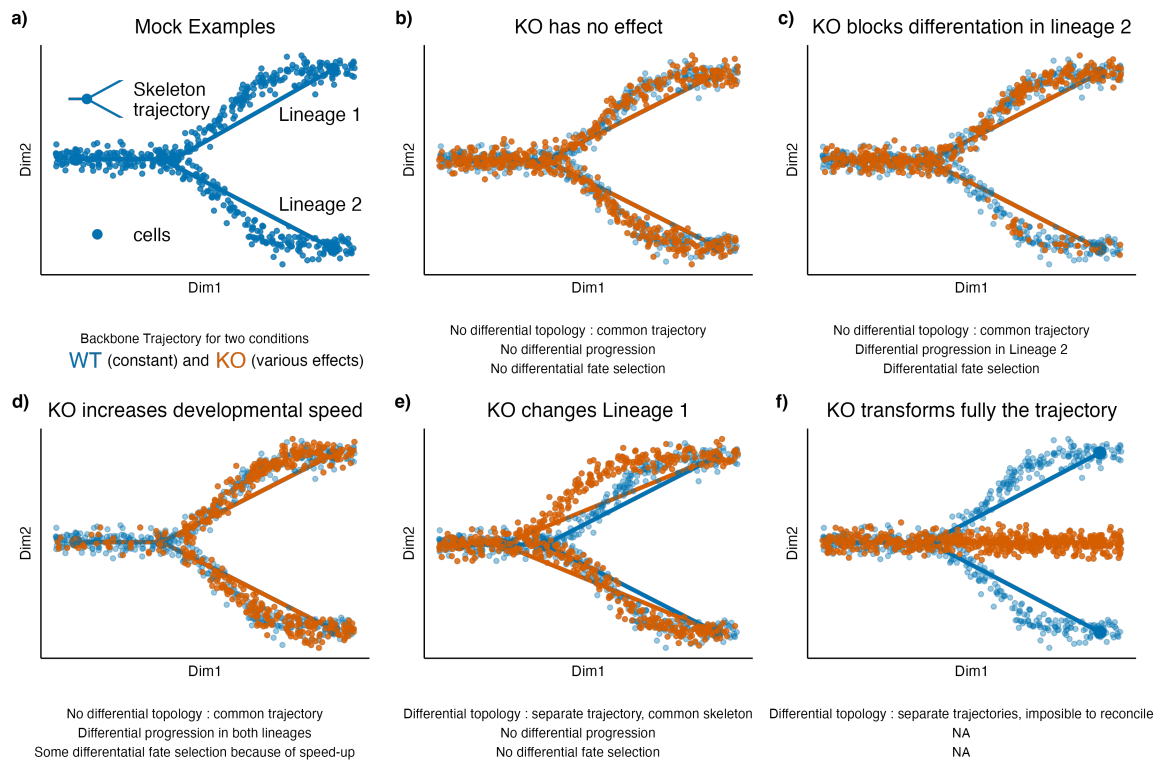

Figure S1: *Illustrating the first two steps of the condiments workflow with several scenarios.* (a) The examples are all built on a similar wild-type backbone, i.e., two lineages that slowly diverge in the absence of knocking out. Cells either originate from a wild-type (WT, blue) or a knock-out (KO, orange) condition. In (b), the knock-out has no effect, all three tests fail to reject their null hypothesis. In (c), the knock-out partly blocks differentiation along Lineage 2, meaning that fewer cells develop along that lineage. In this case, while the `topologyTest` fails to reject the null, we have both differential progression along Lineage 2 and differential fate selection. In (d), the knock-out speeds development, so there are more orange cells toward the end of both lineages. This leads to both differential progression and fate selection. In (e), the knock-out modifies the intermediate stage for Lineage 1 and changes where the lineages bifurcates; based on the `topologyTest`, we fit one trajectory per condition. However, the skeleton structure is unchanged, so there is a mapping between the two trajectories and we can still test for differential progression and fate selection. In both cases, we fail to reject the null. Finally, in (f), the knock-out fully disrupts the developmental process: all cells in the knock-out condition progress along a new lineage. Here, we fit separate trajectories and these cannot be reconciled easily, so we cannot proceed to Steps 2 and 3.

## 1037 S-2.2 Runtimes

1038 Step 3 is indeed by far the slowest of all, followed by Step 1. However, note that both Step 1 and 3 can  
 1039 be fully parallelized and can therefore take advantage of multiple cores. Step 3 scales in the number of  
 1040 genes, which can be offset with parallelization, but also with the number of parameters to estimate.

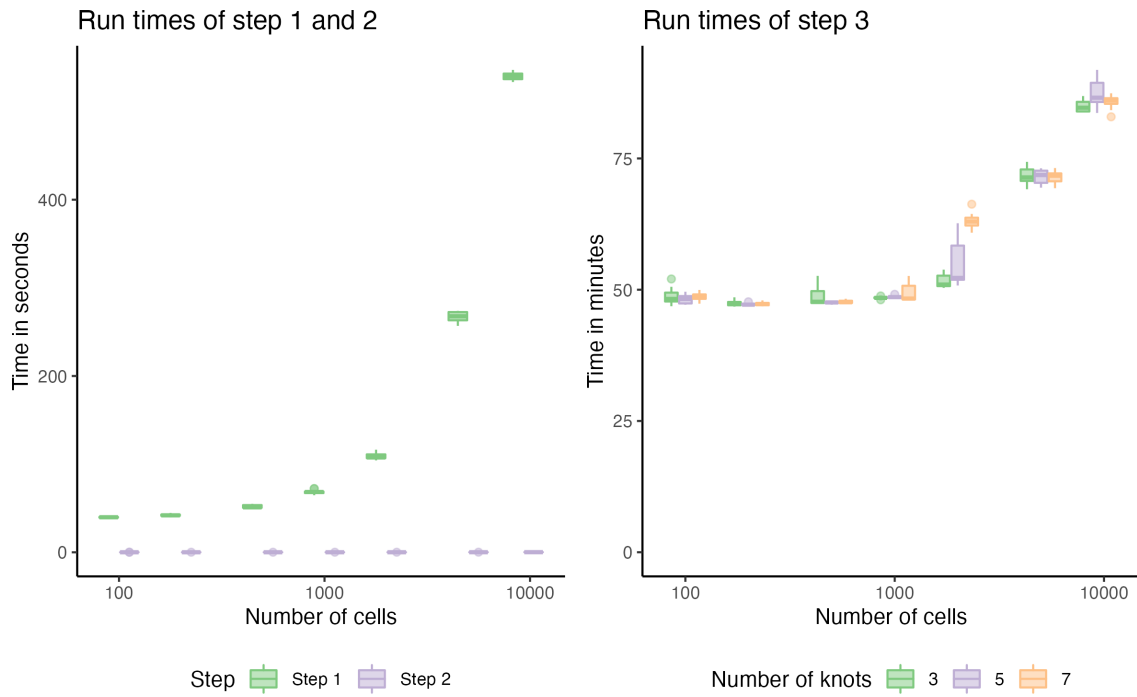

Figure S2: *TGF-β* dataset: runtimes. We compute the runtimes of each step, with 10 repeats, and by downsampling the dataset. Step 1 and 3 are the longest, but they can be parallelized.

1041 **S-2.3 Simulations for Step 2**

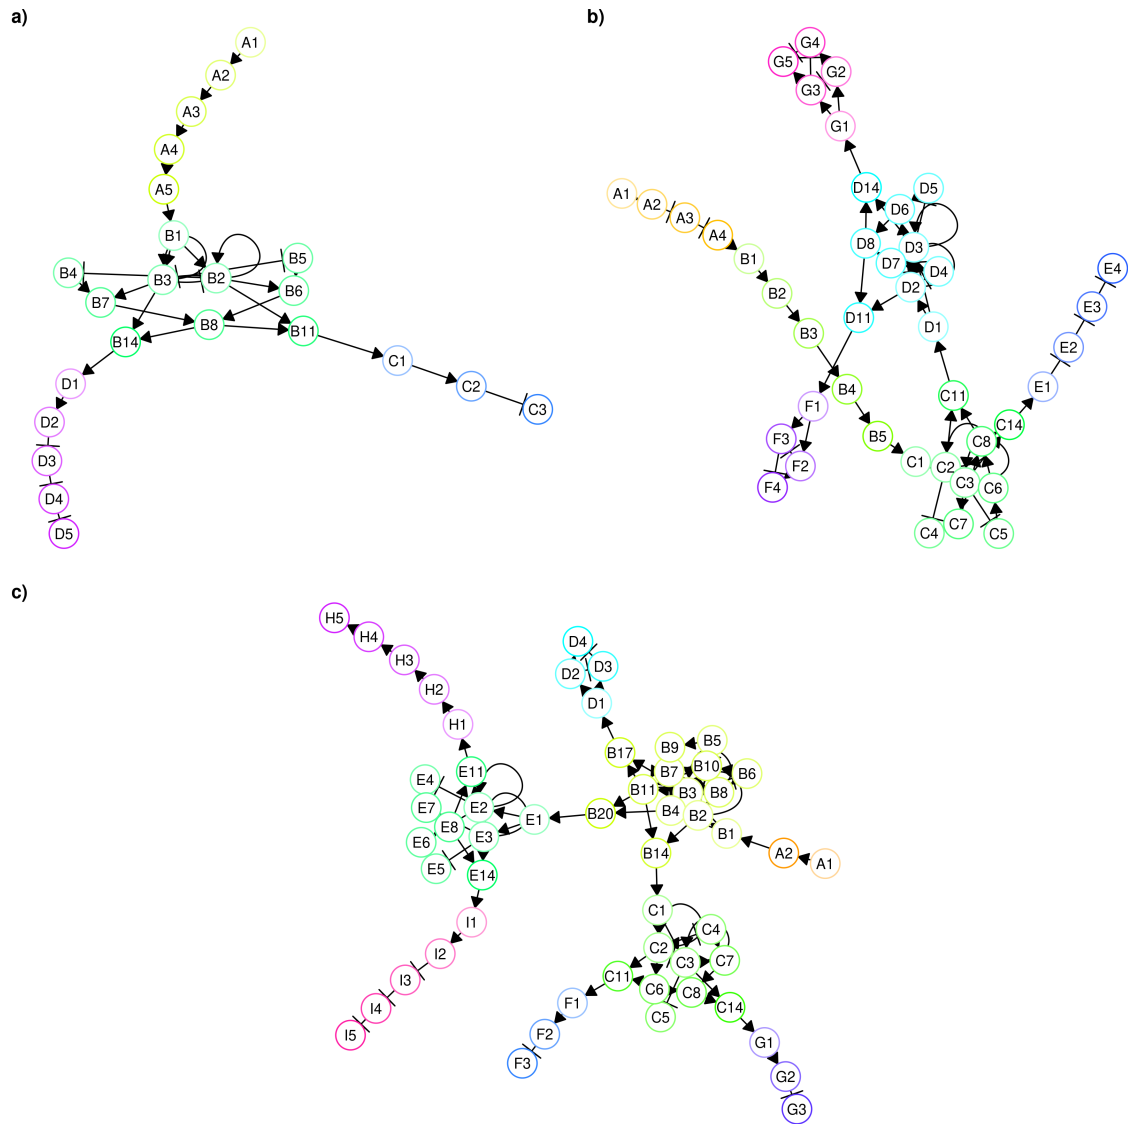

Figure S3: *Simulation example.* Regulator networks for the (a) two-lineage, (b) three-lineage, and (c) five-lineage trajectories.

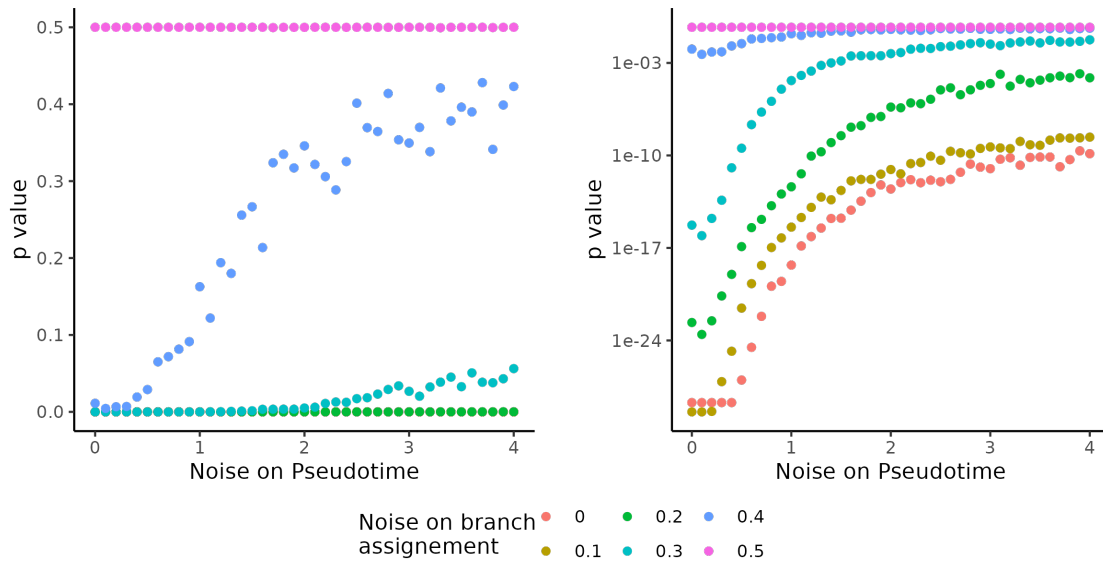

Figure S4: *Sensitivity of Step 2 to incorrect trajectory inference.* The  $p$ -value associated with the progressionTest (y-axis, normal scale and log-scale) are displayed for increasing levels of noise on pseudotime estimation (x-axis) and lineage assignment (color). For each noise level, we do 100 repetitions and plot the median  $p$ -value.

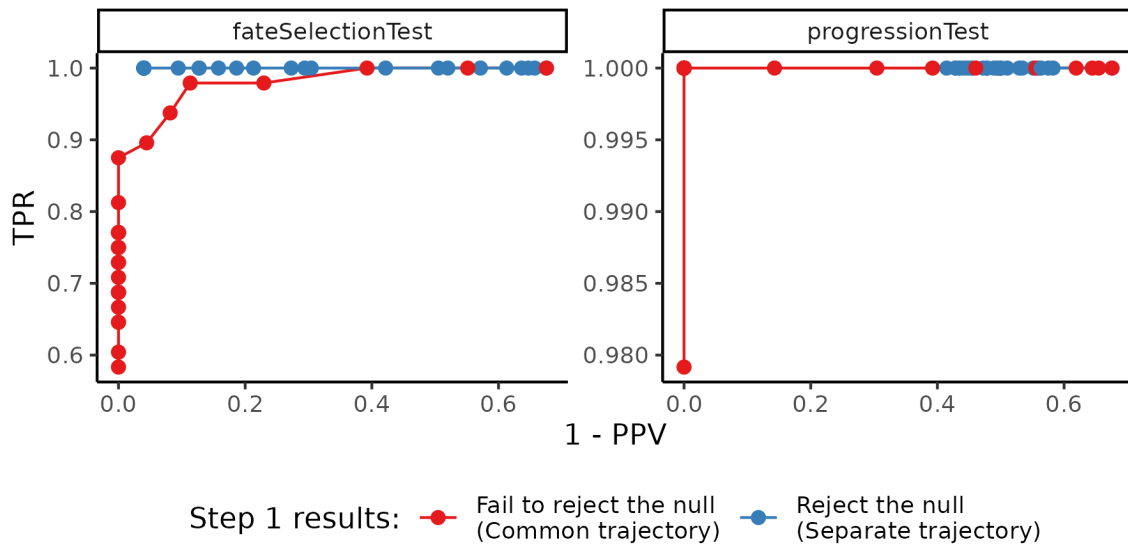

Figure S5: *Sensitivity of Step 2 to incorrect decision at Step 1.* The receiver operating characteristic (ROC) curves are displayed when performing either the fateSelectionTest (left panel) or the progressionTest (right panel), downstream of the following two choices after Step 1: fitting a common trajectory (in red) and a separate trajectory per condition (in blue). Results are similar, although the fateSelectionTest is more impacted

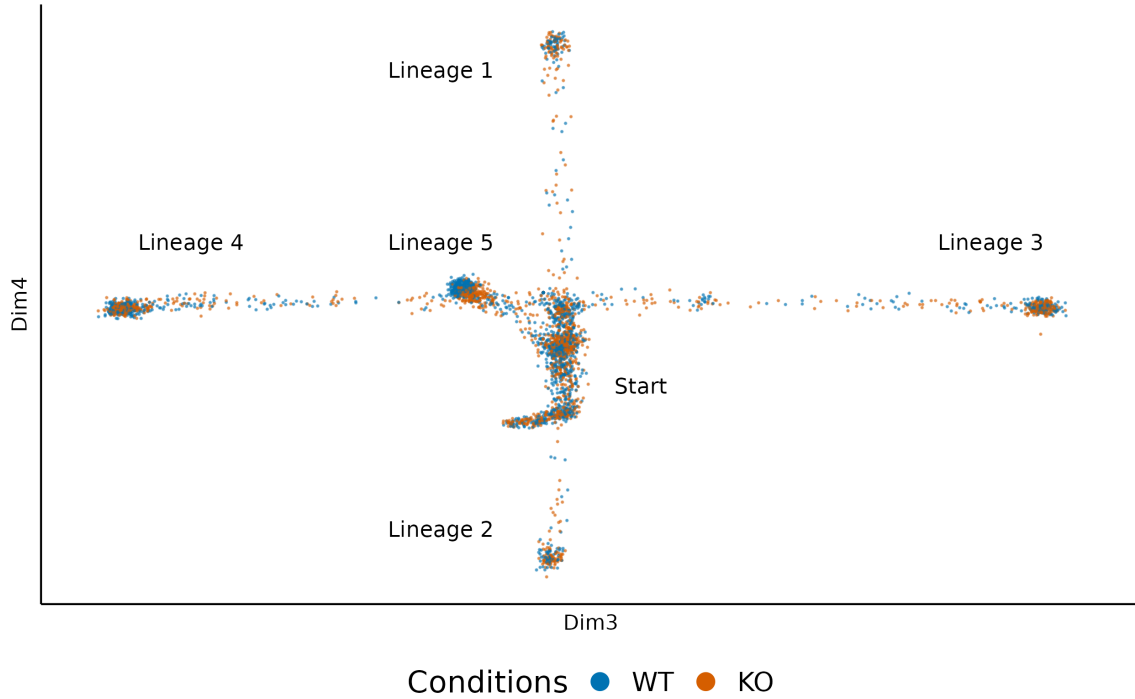

Figure S6: *Simulated dataset of the fourth type* Reduced-dimensional representation of a dataset with five lineages and 3 conditions, such as the one in Fig. 2d, using the third and fourth dimensions to show that the lineages do separate when more dimensions are considered.

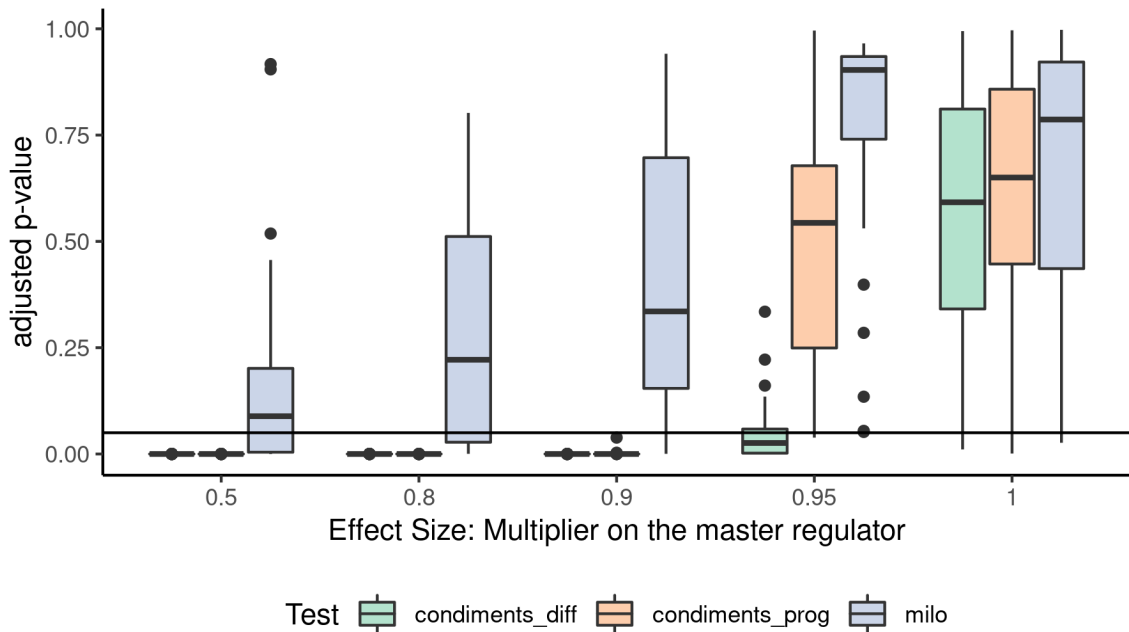

Figure S7: *Results on the third type of simulated dataset*. For all values of  $m \in \{.5, .8, .9, .95, 1\}$ , we generate null datasets with two lineages and three conditions and we compute the adjusted  $p$ -values of all tests that can handle 3 conditions. The distributions of  $p$ -values are then displayed.  $m = 1$  is negative (no effect), while  $m < 1$  is positive (some effect) with smaller values (toward the left) representing stronger effect.



1042 **S-2.4 Statistical validity and properties of the p-values of Step 3**

1043 To be valid, under the null, the empirical distribution of the  $J$   $p$ -values  $p_j$  should verify the following, for  
1044 all  $p \in \{0 : 1\}$ ,

$$\frac{\sum_{j=1}^J 1_{p_j \leq p}}{J} \leq p.$$

1045 We see below that this is true for all log-fold cut-offs. As expected, the test is more and more  
1046 conservative as we increase the log-fold-change, ranging from mildly conservative for a log-fold-change of  
1047 zero, to very conservative for a log-fold-change of 2.

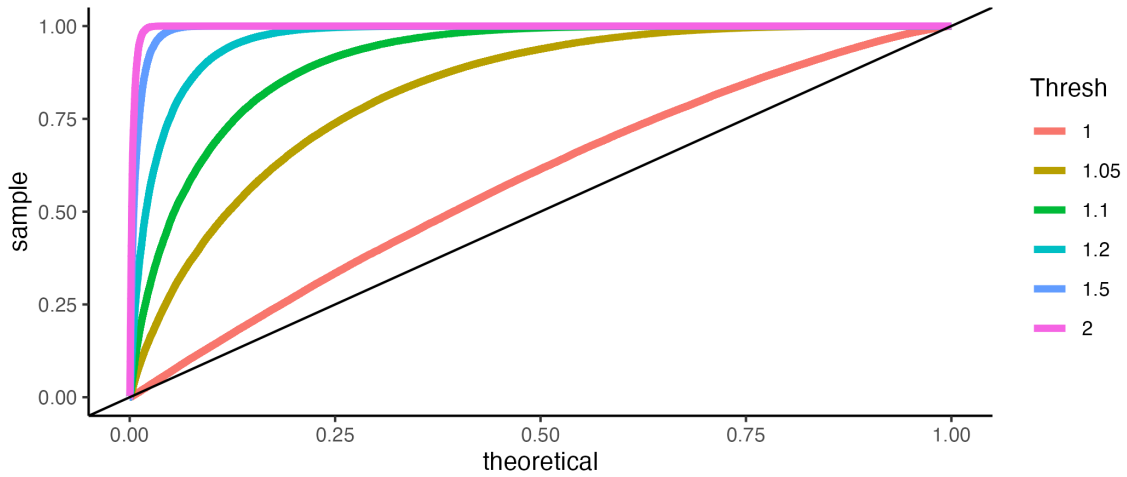

Figure S8: *conditionTest* under the null. Comparison of the distribution of  $p$ -values resulting from running the `conditionTest` for various log-fold-change cut-offs (*Thresh* in log scale), to the nominal uniform distribution.

1048 We then focused on false discovery rate control. We adjusted the  $p$ -values from the `conditionTest`  
1049 via BH-correction and computed the false discovery rate at varying levels of nominal control. We see that,  
1050 when testing against a null of no change (log-fold-change of 0), `conditionTest` with BH-correction does  
1051 not properly control the FDR at any level. On the other hand, when testing against a log-fold-change  
1052 threshold of  $\log(1.2)$  or greater, we control the nominal false discovery rate at appropriate levels for all  
1053 values.

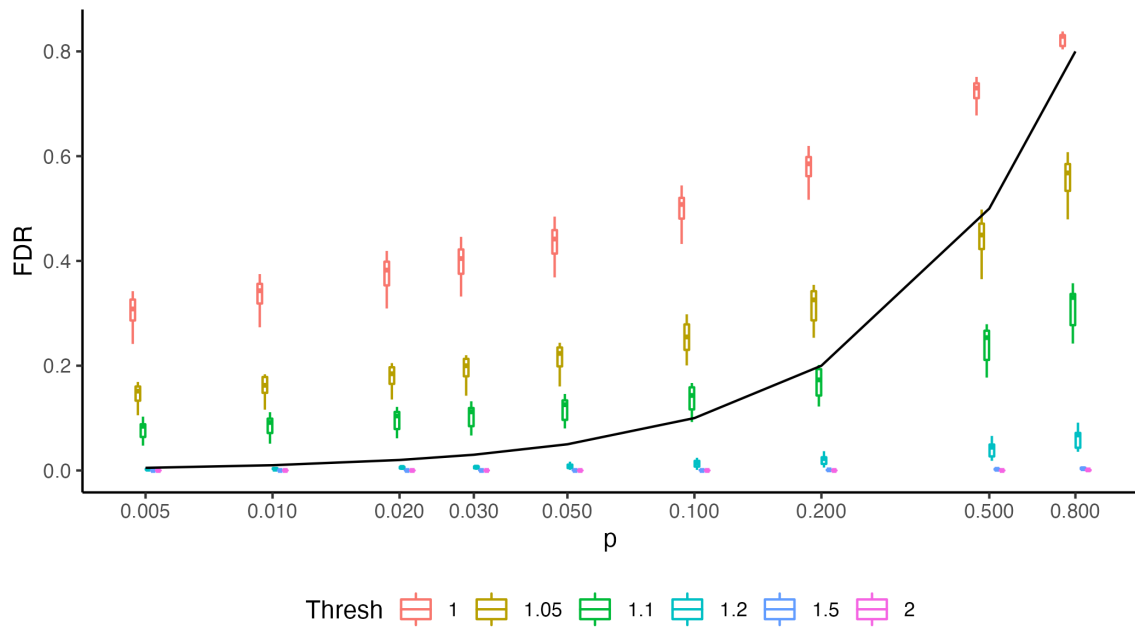

Figure S9: *conditionTest* and FDR control. Comparison of the true and nominal rates of false discoveries.

1054 S-2.5 TGF-B

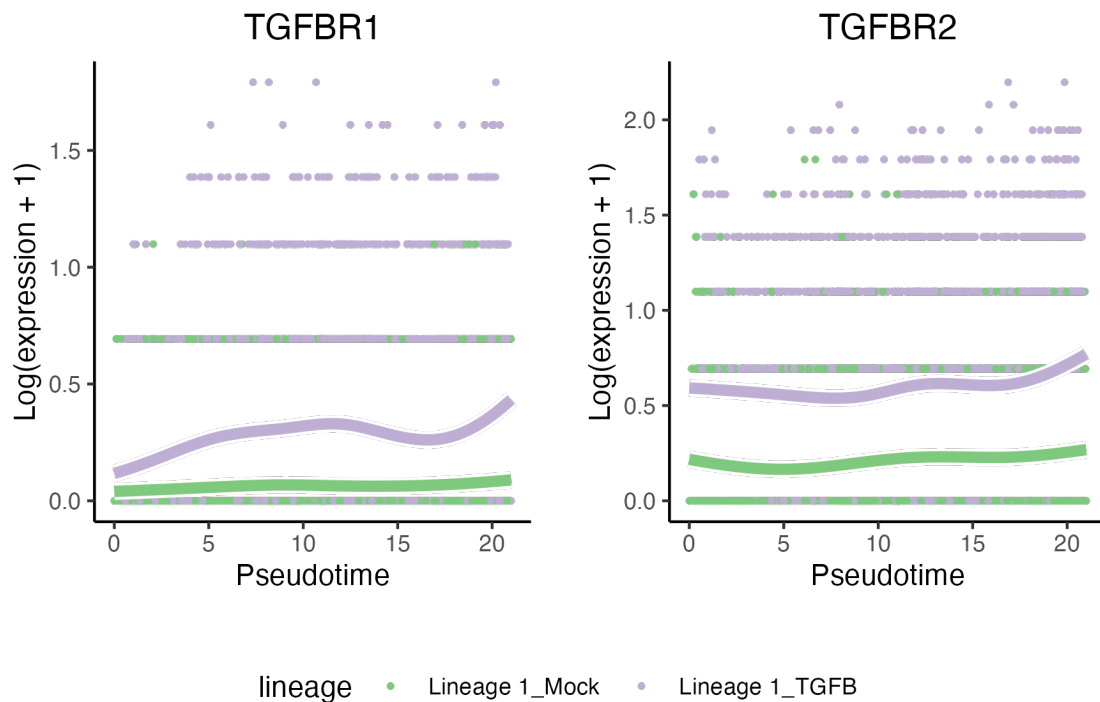

Figure S10: *TGF- $\beta$  dataset: TGF- $\beta$  receptors*. We fit smoothers for the two TGF- $\beta$  receptors, **TGFBR1** and **TGFBR2**. Those two genes are more highly expressed in the TGF- $\beta$  condition.

Table S1: *Gene Set Enrichment Analysis*. We perform a gene set enrichment analysis on all 10,100 genes expressed in the **Fibrosis** dataset, using the test statistic from the `patternTest` and `fgsea` [32]. We adjust for multiple testing by controlling the false discovery rate at the 5% level

| <b>pathway</b>                                           | <b>pvalue</b> | <b>adjusted pvalue</b> |
|----------------------------------------------------------|---------------|------------------------|
| Biological Adhesion                                      | 0.00002       | 0.0174885              |
| Cell Population Proliferation                            | 0.00002       | 0.0174885              |
| Defense Response                                         | 0.00002       | 0.0174885              |
| Negative Regulation Of Multicellular Organismal Process  | 0.00002       | 0.0174885              |
| Anatomical Structure Formation Involved In Morphogenesis | 0.00004       | 0.0174885              |
| Animal Organ Morphogenesis                               | 0.00004       | 0.0174885              |
| Cell Activation                                          | 0.00004       | 0.0174885              |
| Epithelium Development                                   | 0.00004       | 0.0174885              |
| Reproduction                                             | 0.00004       | 0.0174885              |
| Cell Cell Adhesion                                       | 0.00006       | 0.0196746              |
| Locomotion                                               | 0.00006       | 0.0196746              |
| Regulation Of Immune System Process                      | 0.00006       | 0.0196746              |
| Cell Migration                                           | 0.00008       | 0.0224853              |
| Multi Organism Process                                   | 0.00008       | 0.0224853              |
| Response To Corticosteroid                               | 0.00010       | 0.0262328              |
| Positive Regulation Of Immune System Process             | 0.00012       | 0.0277759              |
| Tube Development                                         | 0.00012       | 0.0277759              |
| Tube Morphogenesis                                       | 0.00016       | 0.0349771              |
| Regulation Of Proteolysis                                | 0.00020       | 0.0414202              |
| Regulation Of Peptidase Activity                         | 0.00024       | 0.0465036              |
| Response To Organic Cyclic Compound                      | 0.00026       | 0.0465036              |
| Response To Oxygen Containing Compound                   | 0.00026       | 0.0465036              |
| Regulation Of Multicellular Organismal Development       | 0.00028       | 0.0479034              |

1055 **S-2.6 Fibrosis**

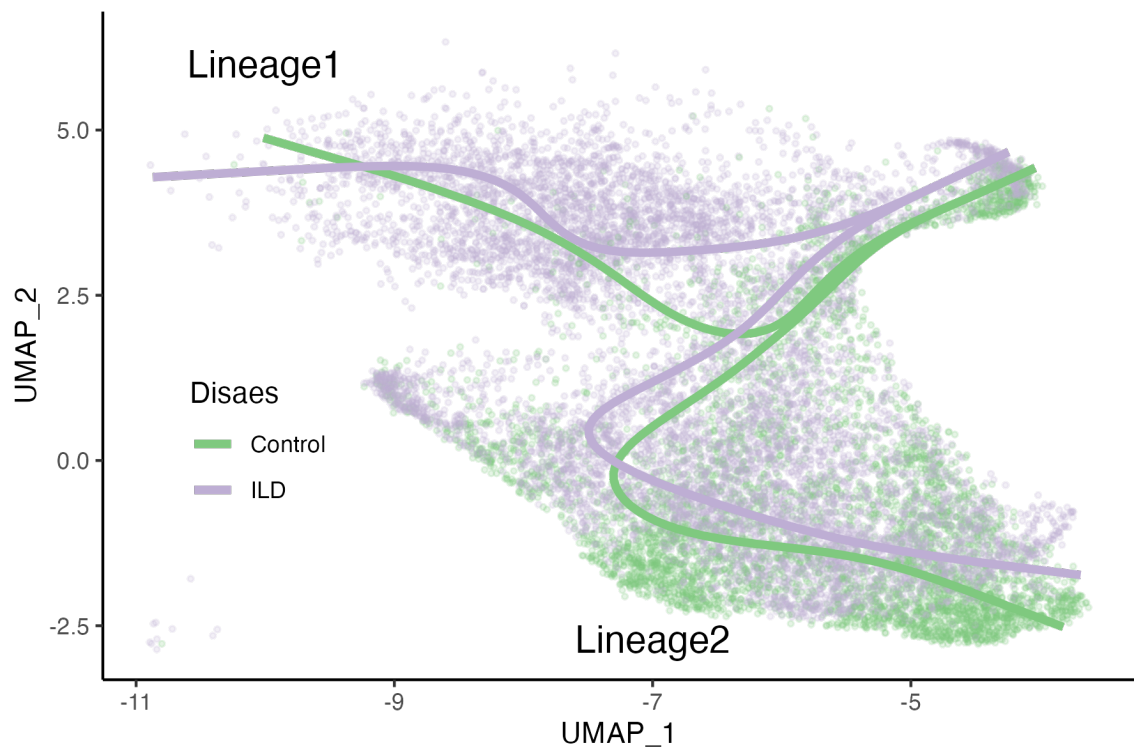

Figure S11: *Fibrosis* dataset: *fitting separate trajectories*. One trajectory is fitted per condition, using Slingshot. The absence of any cells from SCGB3A2+ in the control leads to an inappropriate shrinkage of the lineages (green curves) towards the AT1 cells.

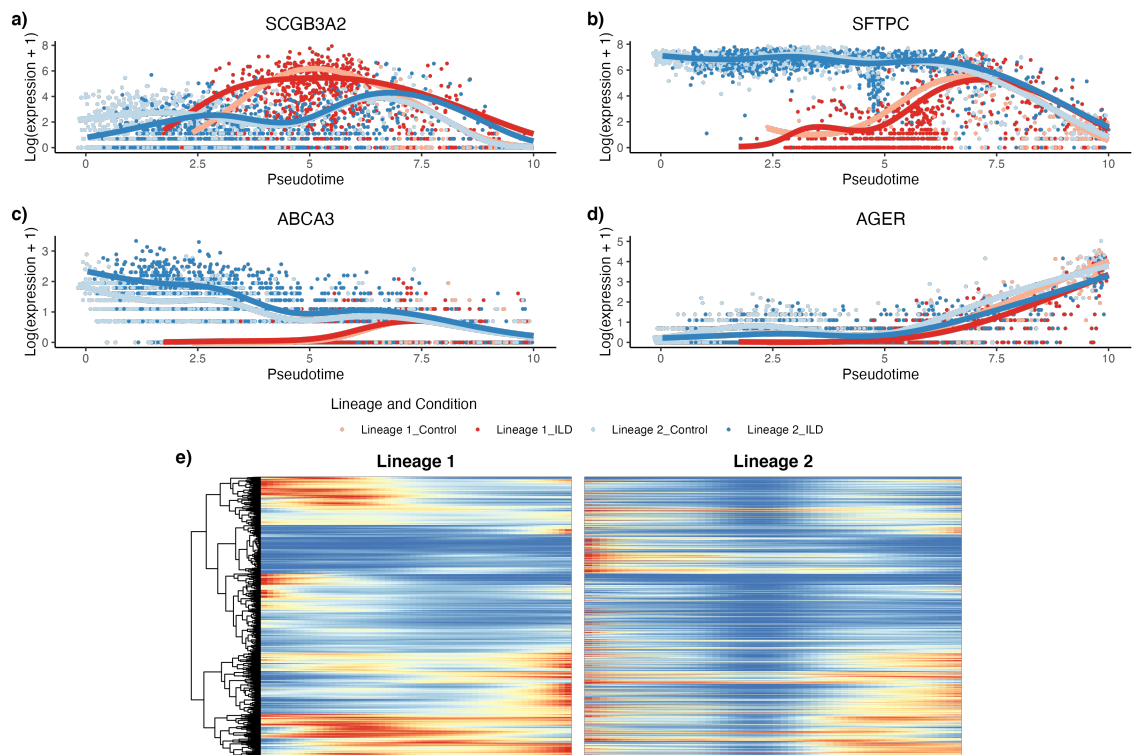

Figure S12: *Fibrosis* dataset: *Differential gene expression*. The tradeSeq gene expression model is fitted using the trajectory computed with slingshot. Differential expression between lineages is assessed using the patternTest. The four genes mentioned in the original paper all display differences between the two lineages, but none between the conditions (a-d). After adjusting the  $p$ -values to control the FDR at a nominal level of 5%, we display genes in both conditions using a pseudocolor image (e).

1056 **S-2.7 TCDD**

1057 Nault et al. [10] collected a dataset of 16,015 single nuclei to assess the hepatic effects of 2,3,7,8-  
 1058 tetrachlorodibenzo-p-dioxin or TCDD. In particular, they focused on the effect of TCDD on the 9,951  
 1059 hepatocytes cells along the central-portal axis. This dataset is not a developmental dataset per se but still  
 1060 exhibits continuous changes along a spatial axis, demonstrating the versatility of the trajectory inference  
 1061 framework in general, and of the `condiments` workflow in particular.

1062 Fig. S13a shows a reduced-dimensional representation of the dataset, with cells labelled according to  
 1063 treatment/control condition, while Fig. S13b shows the same plot colored by cell type, as derived by the  
 1064 authors of the original publication. The cells are aligned in a continuum, from central to mid-central and  
 1065 then mid-portal and portal. The imbalance score shows some spatial pattern (Fig. S13c). However, the  
 1066 nominal  $p$ -value associated with the `topologyTest` is .07. We therefore fail to reject the null and we infer  
 1067 a common trajectory using `slingshot` on the spatial clusters. This results in a single-lineage trajectory  
 1068 that respects the ordering of the spatial clusters (Fig. S13d). Note that, since the trajectory reflects a  
 1069 spatial continuum rather than a temporal one, the start of the trajectory is arbitrary. However, inverting  
 1070 the start and end clusters amounts to an affine transformation of the pseudotimes for all the cells.  
 1071 Step 2 and 3 are fully invariant to this transformation, so we can pick the Central cluster as the start of the  
 1072 trajectory.

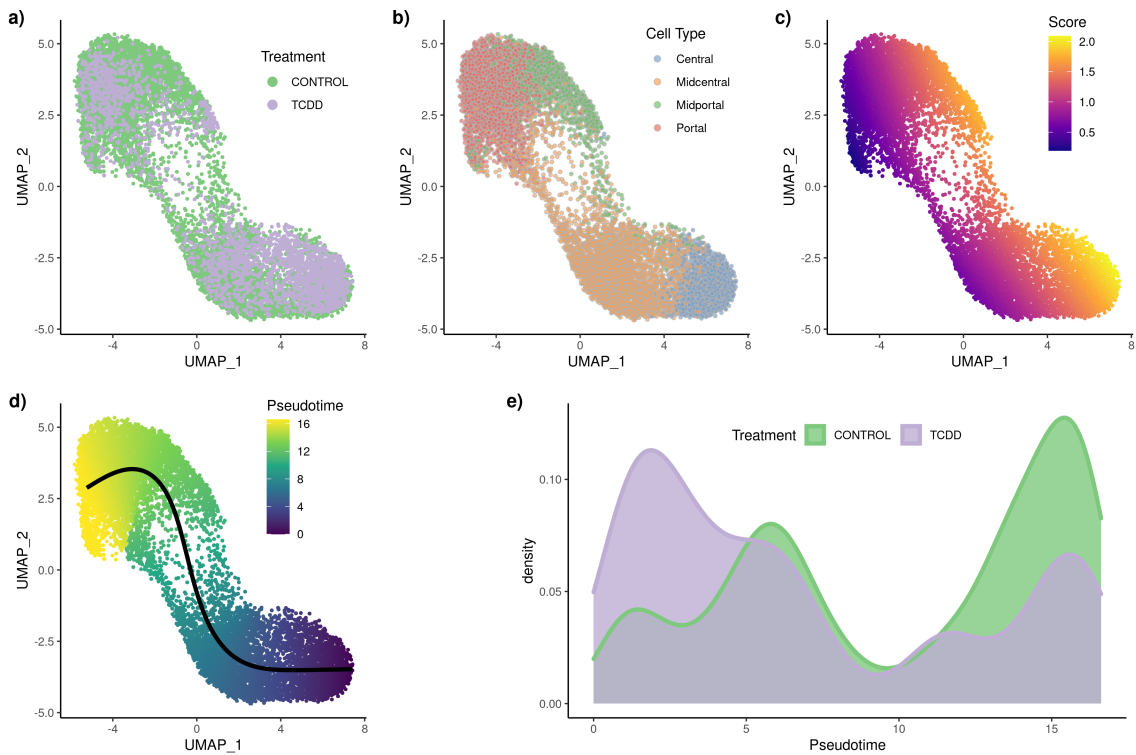

Figure S13: *TCDD dataset: Differential topology and differential progression.* After normalization and projection on a reduced-dimensional space, the cells can be represented, colored either by treatment label (a) or cell type (b). Using the treatment label and the reduced-dimensional coordinates, an imbalance score is computed and displayed (c). The `diffTopoTest` rejects the null and separate trajectories are fitted for each condition (d). After mapping the lineages, there is also differential progression: the pseudotime distribution along the trajectory are not identical (e) and we indeed reject the null using the `diffProgressionTest`.

1073 The densities of the treatment and control pseudotime distributions differ greatly visually (Fig. S13e),  
 1074 with the TCDD density heavily skewed toward the start of the trajectory. Indeed, the `progressionTest`  
 1075 has a nominal  $p$ -value  $\leq 2.2 \times 10^{-16}$ . This coincides with the finding of the original publication which  
 1076 highlighted the periportal hepatotoxicity of TCDD.

1077 The ability of the `progressionTest` to correctly find large-scale changes in the spatial distribution  
 1078 of cells between conditions underscores why we favor fitting a common trajectory. Indeed, the  $p$ -value of

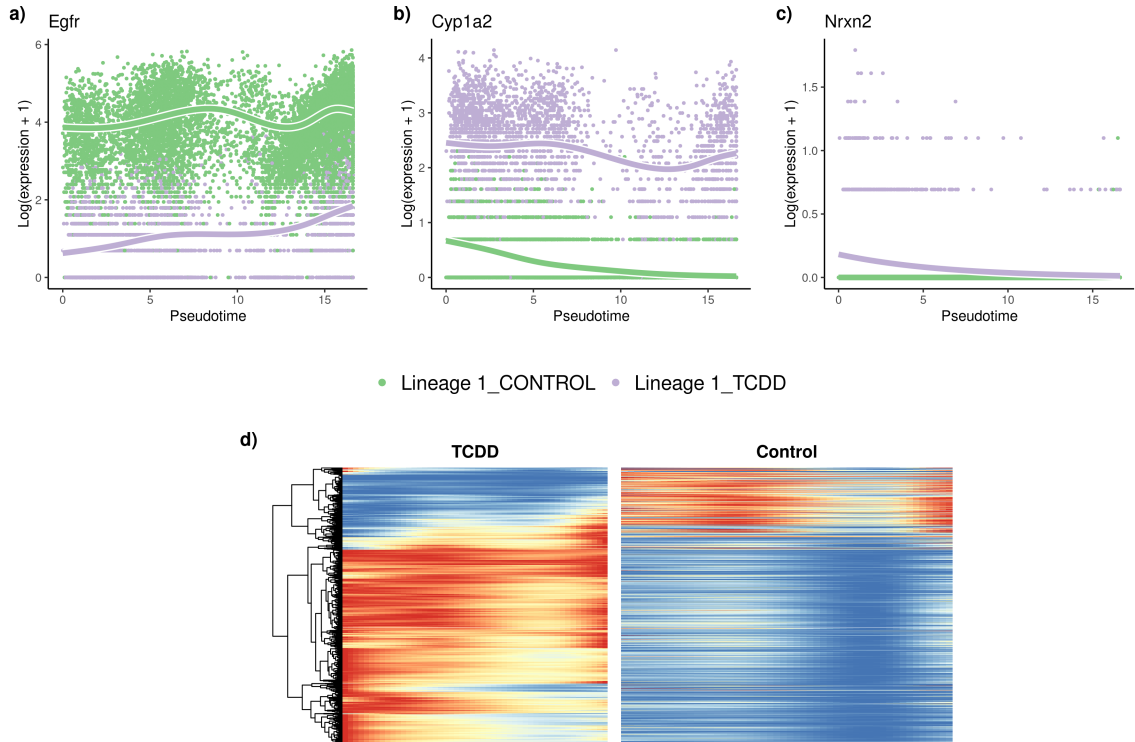

Figure S14: *TCDD* dataset: *Differential expression*. The *tradeSeq* gene expression model is fitted using the trajectory computed with *slingshot*. Differential expression between conditions is assessed using the *conditionTest* and genes are ranked according to the test statistics. The genes with the highest (a), second highest (b), and smallest (c) test statistics are displayed. After adjusting the *p*-values to control the FDR at a nominal level of 5%, we display genes in both conditions using a pseudocolor image (d).

1079 the *topologyTest* in Step 1 is rather small and would have been below .05 if we had not conducted a  
 1080 test against a threshold. However, testing against a threshold and thus fitting a common trajectory does  
 1081 not stop the workflow from finding large-scale differences between conditions in Step 2 and results in a  
 1082 more stable estimate of the trajectory.

1083 After gene filtering, we test 8,027 genes for spatial differential expression between conditions and we  
 1084 find 2,114 DE genes when controlling the FDR at a nominal level of 5%. The genes with the largest,  
 1085 second largest, and smallest test statistics are displayed in Fig.S14a-c. Similarly to Nault et al. [10], we  
 1086 obtain a list of zonal genes from Halpern et al. [49]. The proportion of zonal genes among the DE genes  
 1087 is twice their proportion among non-DE genes.

## 1088 S-2.8 KRAS

### 1089 KRAS dataset

1090 Xue et al. [27] studied the impact of KRAS(G12C) inhibitors at the single-cell level on three models  
 1091 of KRAS(G12C) lung cancers. Specifically, they examined how various cell populations react to these  
 1092 inhibitors and how some cells can return in proliferation mode shortly after the end of the treatment.  
 1093 Here, we want to investigate how the three cancer models (H358, H2122, and SW1573) differ in their  
 1094 response to the KRAS(G12C) inhibitors.

1095 We use the reduced-dimensional representation from the original paper to display the 10,177 cells from  
 1096 the various types (Fig S15a). Using the cancer type labels and the reduced-dimensional coordinates, an  
 1097 imbalance score can be computed (Fig S15b); some regions clearly show an imbalance. This is further  
 1098 confirmed by the *topologyTest*, with *p*-value smaller than  $2.2 \times 10^{-16}$ . We therefore do not fit a common  
 1099 trajectory to all cancer types (Fig S15c).

1100 Note that this does not necessarily imply that the trajectory of reaction to the KRAS(G12C) inhibitors  
 1101 is different between cancer types. Indeed, this may also reflect strong batch effects between conditions,  
 1102 which the normalization scheme was unable to fully remove when integrating the three cancer types in

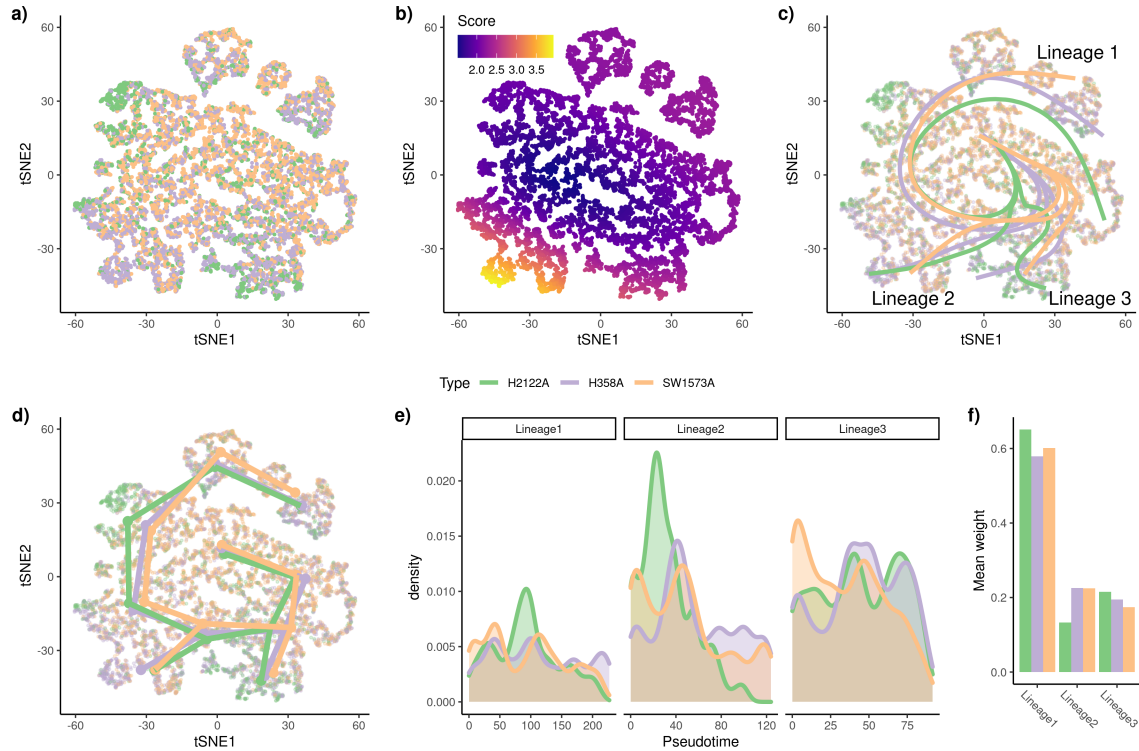

Figure S15: *KRAS* dataset: *Differential topology, differential progression, and differential fate selection*. Using the reduced-dimensional representation of the original publication (t-SNE), the cells can be colored by cancer type (a.). Using the cancer type label and the reduced-dimensional coordinates, an imbalance score is computed and displayed (b). The `topologyTest` rejects the null hypothesis of a common trajectory, we thus fit one trajectory per condition (c). However, the skeleton graphs have the same structure (d), so we can progress to the next steps in the `condiments` workflow. There is differential progression (e) and we indeed reject the null of identical pseudotime distributions along the trajectory using the `progressionTest`. Similarly, there is differential fate selection (f) and we reject the null of identical weight distributions along the trajectory using the `fateSelectionTest`. Here, we summarize the distributions by looking at the average weight for each lineage in each condition, which already shows some clear differences.

1103 one common reduced-dimensional representation. Thus, it is not really possible to draw a biological  
 1104 conclusion at this first step. However, this does mean that a separate trajectory should be fitted to each  
 1105 condition.

1106 Here, the trajectories, although different, are similar enough that we can still use an underlying  
 1107 common skeleton (Fig S15d). Indeed, we keep the tree structure derived by computing the minimum  
 1108 spanning tree (MST) on the clusters using all cells. This way, it is possible to derive a one-to-one mapping  
 1109 between the lineages of the three trajectories and we respect the assumptions detailed in Section 1.2 that  
 1110 are necessary for the `progressionTest` and `fateSelectionTest`.

1111 Using this common mapping, we can then proceed to the `progressionTest`. At the global trajectory  
 1112 level, the nominal  $p$ -value is smaller than  $2.2 \times 10^{-16}$ , showing clear differential progression. At the lineage  
 1113 level, all three lineages show strong differential progression, with  $p$ -values of  $2.2 \times 10^{-16}$ ,  $1.2 \times 10^{-12}$ ,  
 1114 and  $1.2 \times 10^{-14}$ , respectively. The density plots for the pseudotime distributions at the single-lineage  
 1115 level (Fig S15e) indicate that the differential progression is driven by a group of cells from cancer type  
 1116 H2122A. This matches the top left part of the reduced-dimensional plot, the region where cells exit the  
 1117 initial inhibition stage to enter the reactivation stage. The second lineage also shows a difference between  
 1118 H2122A and the two other models. The pseudotime distribution is heavily skewed toward earlier points  
 1119 in that model compared to the other two. Lineage 2 represents differential progression to a drug-induced  
 1120 state. In Lineage 3, it is the SW1573A model that displays more differential progression.

1121 The `fateSelectionTest` also has a  $p$ -value smaller than  $2.2 \times 10^{-16}$ . Although all pairwise com-  
 1122 parisons are significant, the test statistics are much higher for the Lineage 2 vs. 1 and Lineage 2 vs. 3



1123 comparisons. This again suggests that one model differentiates less into the drug-induced path, com-  
 1124 pared to the other two. Since the weights have to sum to 1, the 3-dimensional distribution can be fully  
 1125 summarized by any two components. Fig S16 shows clear differences in distributions but visually inter-  
 1126 preting different 2D distributions is still challenging. A simpler way to compare the distributions is to  
 1127 look at the average weight in each condition for each lineage (Fig S15f). This ignores the correlation  
 1128 between lineages but still allows for some interpretation. We can see in particular that Lineages 1 and 3  
 1129 have greater weights for H2122A than for the other two conditions, which is consistent with the different  
 1130 pairwise statistics.

1131 With the mapped trajectories, we can also perform gene-level analysis using the `conditionTest`.  
 1132 When comparing genes across all lineages and conditions, we find 363 differentially expressed genes when  
 1133 controlling the FDR at nominal level 5%. We show the genes with the highest, second highest, and  
 1134 smallest test statistics in Fig. S17a-c. Displaying these global patterns across all three lineages and all  
 1135 three conditions makes it hard to interpret. We therefore focus on the first (and longest) lineage. In that  
 1136 lineage, we find 366 DE genes and we show their expression patterns along Lineage 1 in all three cancer  
 1137 models in Fig. S17d.

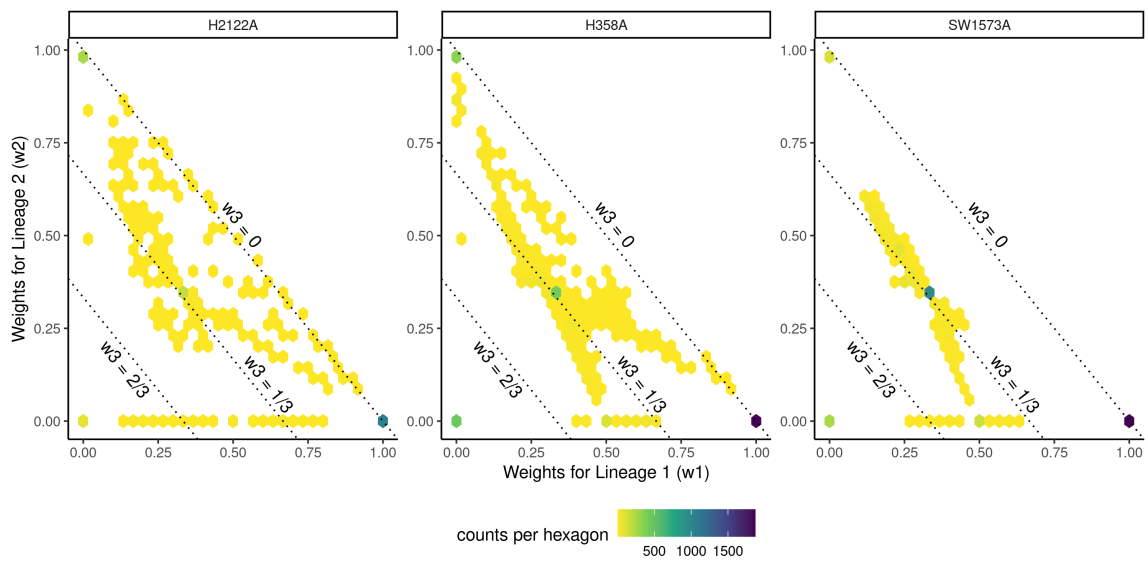

Figure S16: *KRAS* dataset: Differential fate selection.

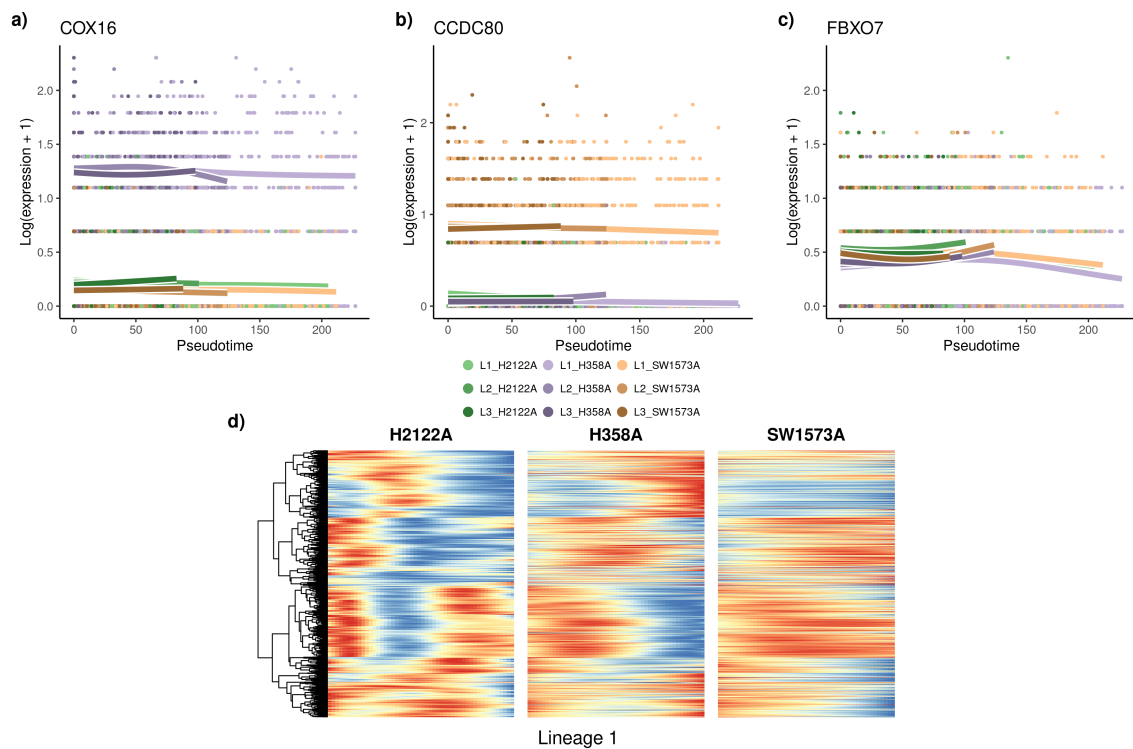

Figure S17: *KRAS* dataset: *Differential expression*. The tradeSeq gene expression model is fitted using the trajectory computed with slingshot. Differential expression between conditions is assessed using the `conditionTest` and genes are ranked according to the test statistics. The genes with the highest (a), second highest (b), and smallest (c) test statistics are displayed. Focusing on the first lineage, we select all differentially expressed genes in that lineage after adjusting the  $p$ -values to control the FDR at a nominal level of 5%. We display the genes for all three conditions using a pseudocolor image (d) along this first lineage.
